# Supplementary material
Source: PubMed Central journal article supplement (PMC11546626)
Supplement: oyae196_suppl_supplementary_appendix.pdf [file oyae196_suppl_supplementary_appendix.pdf]

**Part A. Demographics**

**1) What is your Age?**

- <50             50-54             55-59             60-64             65-69  
 70-74             75-79             80-84             85-90             >90

**2) Are you male or female?**

- male             female

**3) Are you**

- married / living with partner     single     separated /divorced     widowed

**4) Do you live:**

- by yourself     with spouse / significant other     with children     with friend(s)

**5) Highest level of education completed**

- no formal education     primary school     junior/intermediate certificate  
 leaving certificate     post leaving diploma / certificate  
 university degree or equivalent

**6) What is your main activity (tick one box)?**

- retired             unemployed             self-employed  
 full-time employment     working in the home             student

**7) Do you drive yourself to hospital appointments?**

- Yes  
 No, I get a drive from friend / family  
 Other \_\_\_\_\_

**8) Which is your cancer diagnosis?**

- Skin cancer (Not melanoma)             Colon/Rectum cancer  
 Melanoma skin cancer             Leukemia  
 Lung cancer             Lymphoma  
 Breast cancer             Prostate cancer  
 Other: \_\_\_\_\_

**9) How old were you when you were told you had cancer? \_\_\_\_\_**

**10) To the best of your knowledge, are you considered cured of cancer?**

- Yes  
 No, but I am currently receiving treatment  
 No, but I was previously treated  
 No, I have never had any treatment  
 Do not know

**Part B: Social Supports**

**The following two-page questionnaire asks about your social support. Please read the following questions and circle the response that most closely describes your current situation.**

**1. How many *close friends* do you have, people that you feel at ease with, can talk to about private matters?**

- None
- 1 or 2
- 3 to 5
- 6 to 9
- 10 or more
- Unknown

**2. How many of these *close friends* do you see at least once a month?**

- None
- 1 or 2
- 3 to 5
- 6 to 9
- 10 or more
- Unknown

**3. How many *relatives* do you have, people that you feel at ease with, can talk to about private matters?**

- None
- 1 or 2
- 3 to 5
- 6 to 9
- 10 or more
- Unknown

**4. How many of these *relatives* do you see at least once a month?**

- None
- 1 or 2
- 3 to 5
- 6 to 9
- 10 or more
- Unknown

**5. Do you participate in any groups, such as a senior center, social or work group, religious-connected group, self-help group, or charity, public service, or community group?**

- No
- Yes
- Unknown

**6. About how often do you go to religious meetings or services?**

- Never or almost never
- Once or twice a year
- Every few months
- Once or twice a month
- Once a week
- More than once a week
- Unknown

**7. Is there someone available to you whom you can count on to listen to you when you need to talk?**

- None
- 1 or 2
- 3 to 5
- 6 to 9
- 10 or more
- Unknown

**8. Is there someone available to give you good advice about a problem?**

- None
- 1 or 2
- 3 to 5
- 6 to 9
- 10 or more
- Unknown

**9. Is there someone available to you who shows you love and affection?**

- None
- 1 or 2
- 3 to 5
- 6 to 9
- 10 or more
- Unknown

**10. Can you count on anyone to provide you with emotional support (talking over problems or helping you make a difficult decision)?**

- None
- 1 or 2
- 3 to 5
- 6 to 9
- 10 or more
- Unknown

**11. Do you have as much contact as you would like with someone you feel close to, someone in whom you can trust and confide?**

- None
- 1 or 2
- 3 to 5
- 6 to 9
- 10 or more
- Unknown

**People sometimes look to others for companionship, assistance, or other types of support. How often is each of the following kinds of support available to you if you need it? Please mark with an X a box in each line.**

|                                                                           | <b>None of the time</b> | <b>A little of the time</b> | <b>Some of the time</b> | <b>Most of the time</b> | <b>All of the time</b> |
|---------------------------------------------------------------------------|-------------------------|-----------------------------|-------------------------|-------------------------|------------------------|
| <b>Someone to help you if you were confined to bed</b>                    |                         |                             |                         |                         |                        |
| <b>Someone to take you to the doctor if you needed it</b>                 |                         |                             |                         |                         |                        |
| <b>Someone to prepare your meals if you were unable to do it yourself</b> |                         |                             |                         |                         |                        |
| <b>Someone to help with daily chores if you were sick</b>                 |                         |                             |                         |                         |                        |

Patient Questionnaire \_ Version 1 17<sup>th</sup> October 2015

Part C: Online Support

**PLEASE INSERT X IN THE CORRESPONDING BOX.**  
**FOR SOME QUESTIONS YOU CAN TICK MORE THAN ONE BOX**

|                                                                             |                                                                                                                      |
|-----------------------------------------------------------------------------|----------------------------------------------------------------------------------------------------------------------|
| 1. Do you have a computer with internet access at home                      | Yes <input type="checkbox"/><br>No <input type="checkbox"/>                                                          |
| 2. Can you use the computer                                                 | Yes <input type="checkbox"/><br>No <input type="checkbox"/>                                                          |
| 3. Can you use the internet                                                 | Yes <input type="checkbox"/><br>No <input type="checkbox"/>                                                          |
| 4. Do you have a smartphone or tablet ?                                     | Yes <input type="checkbox"/><br>No <input type="checkbox"/>                                                          |
| 5. Do you use e-mail ?                                                      | Yes <input type="checkbox"/><br>No <input type="checkbox"/>                                                          |
| 6. Do you use the internet to talk to others about your cancer or treatment | Yes <input type="checkbox"/><br>No <input type="checkbox"/>                                                          |
| If yes to 6, do you connect to                                              | Patient forums <input type="checkbox"/><br>Personal blogs <input type="checkbox"/><br>Other <input type="checkbox"/> |
| 7. How do you look up medical information                                   | Search engines (Google etc) <input type="checkbox"/><br><br>Specific websites <input type="checkbox"/>               |

Patient Questionnaire \_ Version 1 17<sup>th</sup> October 2015

|                                               |                                                                                                           |
|-----------------------------------------------|-----------------------------------------------------------------------------------------------------------|
| 8. Which cancer websites have you used before | Irish cancer society (Cancer.ie) <input type="checkbox"/>                                                 |
|                                               | Macmillan cancer support (www.macmillan.org.uk) <input type="checkbox"/>                                  |
|                                               | National cancer institute website (cancer.gov) <input type="checkbox"/>                                   |
|                                               | American Society of Clinical Oncology patient's information website (cancer.net) <input type="checkbox"/> |
|                                               | Others <input type="checkbox"/>                                                                           |

This is the end of the questionnaire.  
Thank you for participating.
